# Supplementary material for: The micro-RNA content of unsorted cryopreserved bovine sperm and its relation to the fertility of sperm after sex-sorting
Source: PubMed Central journal article supplement (PMC7792310; doi:10.1186/s12864-020-07280-9), 2021-01-07
Supplement: 12864_2020_7280_MOESM8_ESM.pdf [file 12864_2020_7280_MOESM8_ESM.pdf]

**Figure C.** Representative BioAnalyzer electropherogram of total RNA extracted from cryopreserved bovine sperm. Electropherograms of the RNA ladder used for the assay (top panel) as well as the sperm total RNA sample (bottom panel) are presented.

Assay Class: Eukaryote Total RNA Pico Created: 5/7/2018 3:46:02 PM  
 Data Path: C:\...Eukaryote Total RNA Pico\_DEDAE00458\_2018-05-07\_15-46-02.xad Modified: 5/7/2018 4:13:29 PM

**Electropherogram Summary**

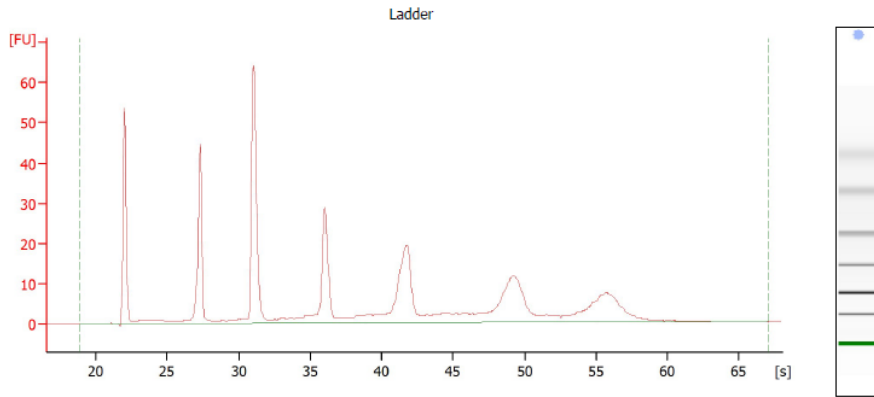

**Overall Results for Ladder**

RNA Area: 390.0 Result Flagging Color:   
 RNA Concentration: 1,000 pg/μl Result Flagging Label: All Other Samples

Assay Class: Eukaryote Total RNA Pico Created: 5/7/2018 3:46:02 PM  
 Data Path: C:\...Eukaryote Total RNA Pico\_DEDAE00458\_2018-05-07\_15-46-02.xad Modified: 5/7/2018 4:13:29 PM

**Electropherogram Summary Continued ...**

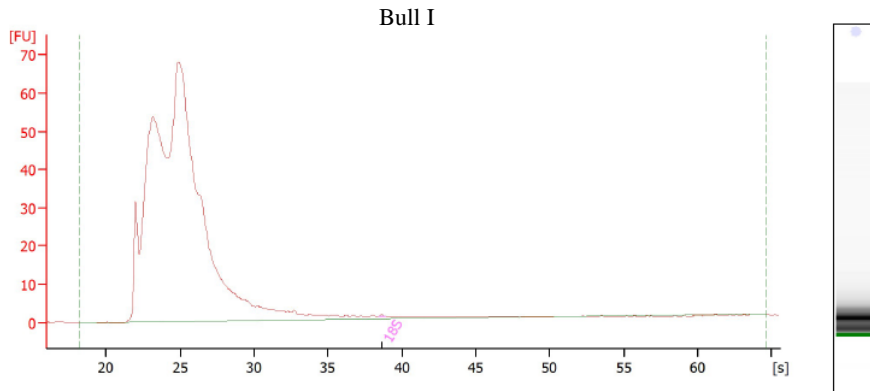

**Overall Results for sample 9 : Bull I**

RNA Area: 998.2 RNA Integrity Number (RIN): 2.5 (B.02.09)  
 RNA Concentration: 2,559 pg/μl Result Flagging Color:   
 rRNA Ratio [28s / 18s]: 0.0 Result Flagging Label: RIN: 2.50

**Fragment table for sample 9 : Bull I**

| Name | Start Time [s] | End Time [s] | Area | % of total Area |
|------|----------------|--------------|------|-----------------|
| 18S  | 38.43          | 38.85        | 0.3  | 0.0             |
